# Supplementary material for: Correlation of interfacial tension with density and dielectric constant for binary systems containing water and an organic component
Source: Royal Society of Chemistry journal article supplement (doi:10.1039/d3nj04861f), 2023-01-01
Supplement: d3nj04861f1.pdf [file d3nj04861f1.pdf]

## Supporting Information

### **Correlation of Interfacial Tension with Density and Dielectric Constant for Binary Systems Containing Water and an Organic Component**

**Hongfei Wang<sup>a \*</sup>, Chengjin Xu<sup>b</sup>**

*<sup>a</sup> School of Chemistry and Chemical Engineering, Shaanxi University of Science and Technology, Xi'an 710021, PR China*

*<sup>b</sup> Institute for Smart Materials & Engineering, University of Jinan, Jinan 250022, PR China*

\* To whom correspondence should be addressed

Email: 1599602526@qq.com

## Table of Contents

**Table S1** The data of  $\varepsilon_r$  and  $\rho$  of 41 organic liquids and the  $\gamma_{\text{ow-exp}}$ ,  $\gamma_{\text{ow-cal}}$ , and  $u_c(\gamma_{\text{ow}})$  values of 41 binary systems.

**Fig. S1** Correlation between experimental liquid-liquid interfacial tension ( $\gamma_{\text{ow-exp}}$ ) and the calculated ones ( $\gamma_{\text{ow-cal}}$ ) using eqn (15) for 41 binary systems. The symbols represent experimental data, and the solid lines represent the fitting ones.

**Table S1** The data of  $\varepsilon_r$  and  $\rho$  of 41 organic liquids and the  $\gamma_{\text{ow-exp}}$ ,  $\gamma_{\text{ow-cal}}$ , and  $u_c(\gamma_{\text{ow-cal}})$  values of 41 binary systems.

| Organic liquids        | $T$ (K) | $\gamma_{\text{ow-exp}}$ (mN/m) <sup>1,2</sup> | $\gamma_{\text{ow-cal}}$ (mN/m) | $u_c(\gamma_{\text{ow}})$ / (mN/m) | $\varepsilon_r$ <sup>3</sup> | $\rho$ (g/cm <sup>3</sup> ) <sup>4,5</sup> |
|------------------------|---------|------------------------------------------------|---------------------------------|------------------------------------|------------------------------|--------------------------------------------|
| 2,2,4-Trimethylpentane | 293     | 50.0                                           | 51.4                            | 0.126                              | 1.943                        | 0.692                                      |
| 2,2-Dimethyl butane    | 293     | 49.7                                           | 53.7                            | 0.138                              | 1.869                        | 0.649                                      |
| 2,3-Dimethyl butane    | 293     | 49.8                                           | 53.0                            | 0.134                              | 1.889                        | 0.662                                      |
| 2,4-Dimethyl pentane   | 293     | 50.0                                           | 52.5                            | 0.131                              | 1.902                        | 0.673                                      |
| 3-Methyl pentane       | 293     | 49.9                                           | 52.9                            | 0.134                              | 1.886                        | 0.664                                      |
| 2-Methyl pentane       | 293     | 48.9                                           | 53.4                            | 0.136                              | 1.886                        | 0.653                                      |
| 3-Methyl hexane        | 293     | 50.4                                           | 51.7                            | 0.128                              | 1.920                        | 0.687                                      |
| Pentane                | 293     | 49.0                                           | 54.8                            | 0.145                              | 1.837                        | 0.626                                      |
| Hexane                 | 293     | 49.7                                           | 53.2                            | 0.135                              | 1.887                        | 0.659                                      |
| Heptane                | 293     | 50.2                                           | 51.9                            | 0.128                              | 1.921                        | 0.684                                      |
| Octane                 | 293     | 50.2                                           | 50.9                            | 0.123                              | 1.948                        | 0.703                                      |
| Cyclohexane            | 293     | 50.2                                           | 46.6                            | 0.105                              | 2.024                        | 0.779                                      |
| Nonane                 | 293     | 52.4                                           | 50.0                            | 0.119                              | 1.972                        | 0.718                                      |
| Decane                 | 293     | 53.2                                           | 49.4                            | 0.116                              | 1.985                        | 0.730                                      |
| Undecane               | 293     | 53.1                                           | 48.8                            | 0.114                              | 1.997                        | 0.740                                      |
| Dodecane               | 293     | 53.7                                           | 48.2                            | 0.111                              | 2.012                        | 0.750                                      |
| Tridecane              | 293     | 54.0                                           | 47.8                            | 0.110                              | 2.021                        | 0.756                                      |
| Tetradecane            | 293     | 54.5                                           | 47.4                            | 0.108                              | 2.034                        | 0.762                                      |
| Hexadecane             | 293     | 55.2                                           | 46.4                            | 0.104                              | 2.046                        | 0.780                                      |
| 1-Tridecene            | 293     | 49.3                                           | 46.7                            | 0.103                              | 2.139                        | 0.766                                      |
| 1-Tetradecene          | 293     | 47.8                                           | 46.2                            | 0.102                              | 2.130                        | 0.775                                      |
| 1-Pentadecene          | 293     | 47.7                                           | 46.3                            | 0.102                              | 2.120                        | 0.775                                      |
| 1-Hexadecene           | 293     | 47.5                                           | 45.8                            | 0.101                              | 2.130                        | 0.783                                      |
| Benzene                | 293     | 34.1                                           | 39.4                            | 0.079                              | 2.283                        | 0.874                                      |
| Toluene                | 293     | 36.1                                           | 39.1                            | 0.077                              | 2.379                        | 0.870                                      |
| o-Xylene               | 293     | 37.2                                           | 40.3                            | 0.082                              | 2.562                        | 0.879                                      |
| m-Xylene               | 293     | 37.9                                           | 39.3                            | 0.078                              | 2.359                        | 0.868                                      |
| p-Xylene               | 293     | 38.6                                           | 37.4                            | 0.070                              | 2.274                        | 0.861                                      |
| Ethylbenzene           | 293     | 38.4                                           | 38.9                            | 0.076                              | 2.446                        | 0.867                                      |
| Butylbenzene           | 293     | 39.6                                           | 39.8                            | 0.079                              | 2.359                        | 0.860                                      |
| 3-Methyl-1-butanol     | 293     | 4.8                                            | 4.0                             | 0.006                              | 15.63                        | 0.809                                      |

|             |     |      |      |       |       |       |
|-------------|-----|------|------|-------|-------|-------|
| 1-Butanol   | 293 | 1.8  | 0.5  | 0.001 | 17.84 | 0.810 |
| Isobutanol  | 293 | 2.0  | 1.7  | 0.003 | 17.26 | 0.803 |
| 1-Pentanol  | 293 | 4.4  | 4.7  | 0.007 | 15.13 | 0.811 |
| Isoamylol   | 293 | 4.8  | 8.0  | 0.012 | 13.71 | 0.809 |
| 1-Hexanol   | 293 | 6.8  | 8.8  | 0.013 | 13.03 | 0.814 |
| 1-Heptanol  | 293 | 7.7  | 10.7 | 0.015 | 11.75 | 0.822 |
| 1-Octanol   | 293 | 8.5  | 13.7 | 0.020 | 10.30 | 0.827 |
| 2-Pentanone | 293 | 6.3  | 4.4  | 0.006 | 15.45 | 0.809 |
| 2-Hexanone  | 293 | 9.6  | 5.8  | 0.008 | 14.56 | 0.812 |
| 2-Heptanone | 293 | 12.4 | 10.5 | 0.015 | 11.95 | 0.820 |

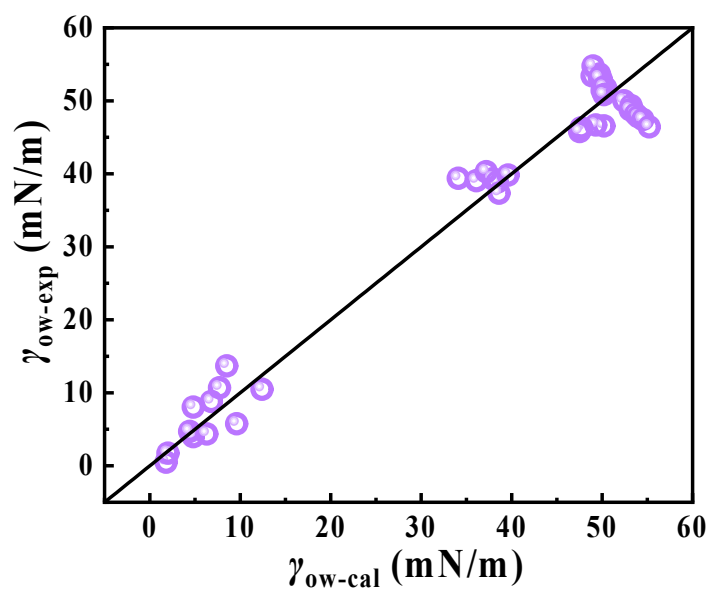

**Fig. S1** Correlation between experimental liquid-liquid interfacial tension ( $\gamma_{ow-exp}$ ) and the calculated ones ( $\gamma_{ow-cal}$ ) using eqn (15) for 41 binary systems. The symbols represent experimental data, and the solid lines represent the fitting ones.

## References

- 1 J. F. Fu, B. Q. Li and Z. H. Wang, *Chem. Eng. Sci.*, 1986, **41**, 2673–2679.
- 2 R. David, *Colloids Surf. A*, 2016, **498**, 156–160.
- 3 D.R. Lide, *Hand book of Chemistry and Physics*. 84th Edition, CRC Press, Boca Raton, FL. USA. 2003.
- 4 MACKLIN, Density for some liquids, <http://www.macklin.cn>.
- 5 Chemical Book, Dielectric constant and density for some liquids, <http://www.chemicalbook.com>.
